# Supplementary material
Source: PubMed Central journal article supplement (PMC2942033)

**Figure E-1. Significant canonical pathways present in the peripheral blood of ischemic stroke patients**

IPA analysis identified the top-5 most significant canonical pathways in the peripheral blood of ischemic stroke patients were: CD28 signaling in T-helper cells ( $p=4.03E00$ ); nuclear factor of activated T cells (NFAT) in regulation of the immune response ( $p=4.03E00$ ); dendritic cell maturation ( $p=3.4E00$ ); toll-like receptor signaling ( $p=3.33E00$ ); and calcium-induced T-lymphocyte apoptosis ( $p=2.92E00$ ).

For questions related to the material in this supplemental figure contact Taura L. Barr at [barrt@mail.nih.gov](mailto:barrt@mail.nih.gov).

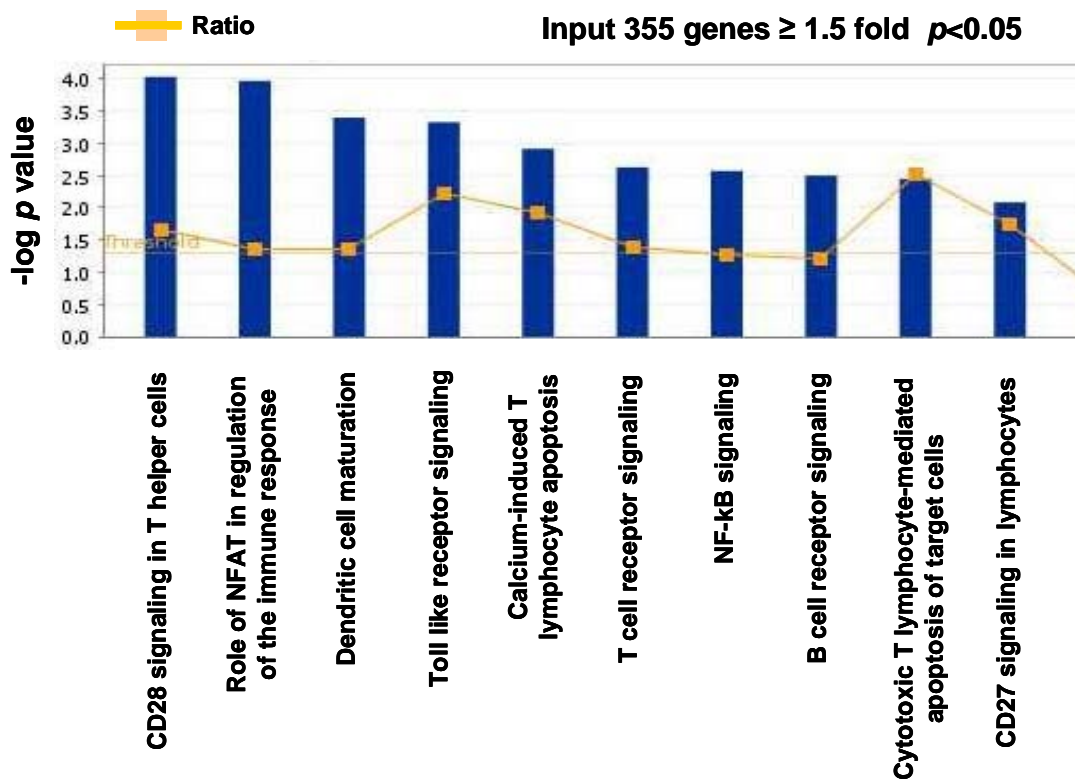

**Data Description**

| Data Set              | Fold Change cutoff; pvalue | Input Genes | Genes mapped to knowledge database | Genes eligible for pathway analysis |
|-----------------------|----------------------------|-------------|------------------------------------|-------------------------------------|
| Stroke versus Control | $\geq 1.5$ ; $<0.05$       | 500         | 484                                | 355                                 |

## Pathway legend

- ↑, red color – up-regulated
- ↓, green color – down-regulated

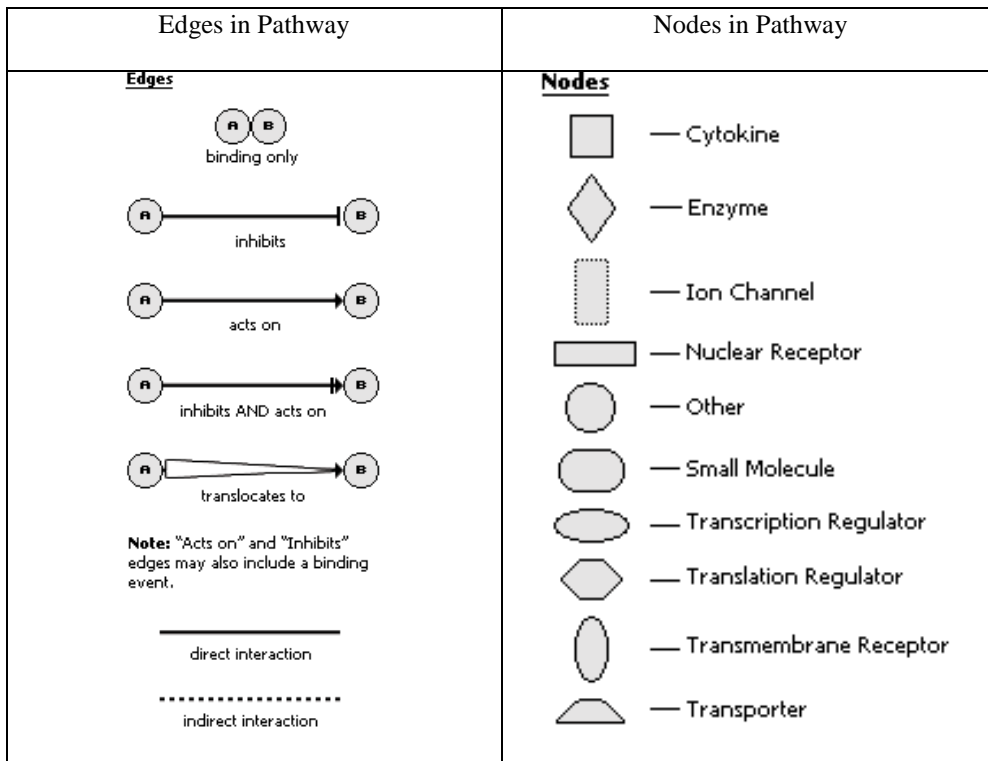

1. There were 12 genes in the dataset involved in CD28 signaling in T-helper cells ( $p=4.03E00$ ): *CD247*, *FOS*, *ACTR3*, *CD3E*, *CDC42*, *PPP3R1*, *ITPR3*, *ARPC5*, *ZAP70*, *CD3D*, *HLA-DRB5*, and *ITK* ( $p=4.03E00$ ).

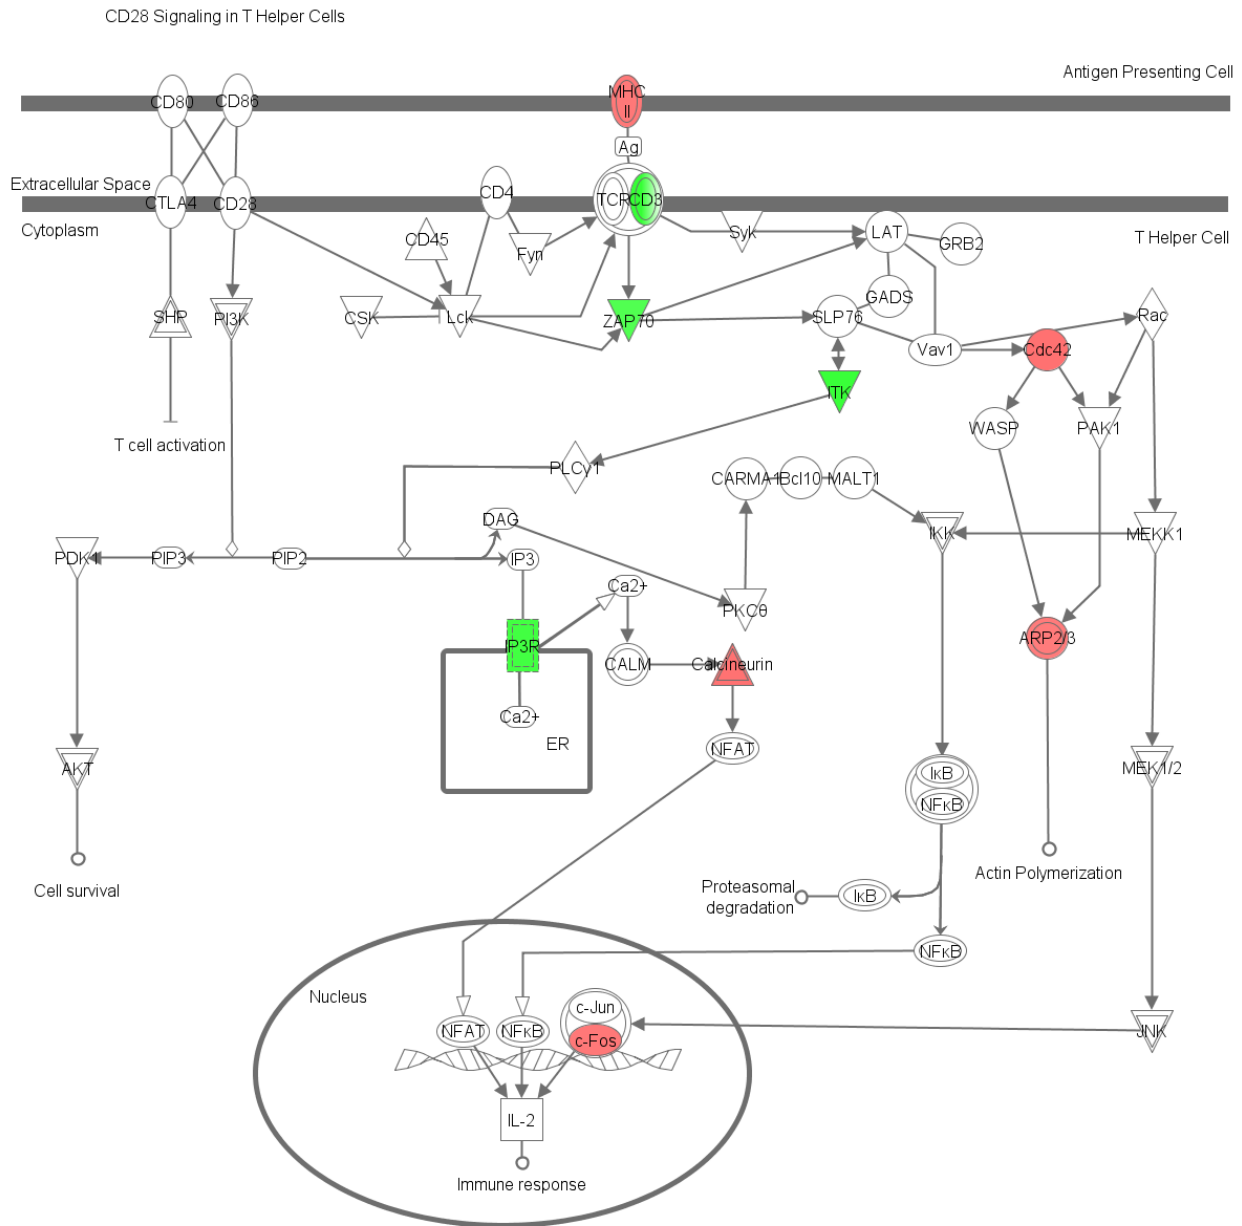

2. There are 15 genes in the dataset involved in NFAT regulation ( $p=4.03E00$ ): *FCGR3B*, *CD247*, *CD3E*, *FCGR2A*, *FCGR1A*, *CD3D*, *FOS*, *PPP3R1*, *ITPR3*, *ZAP70*, *GNA13*, *FCGR1B*, *FCGR3A*, *HLA-DRB5*, and *ITK*).

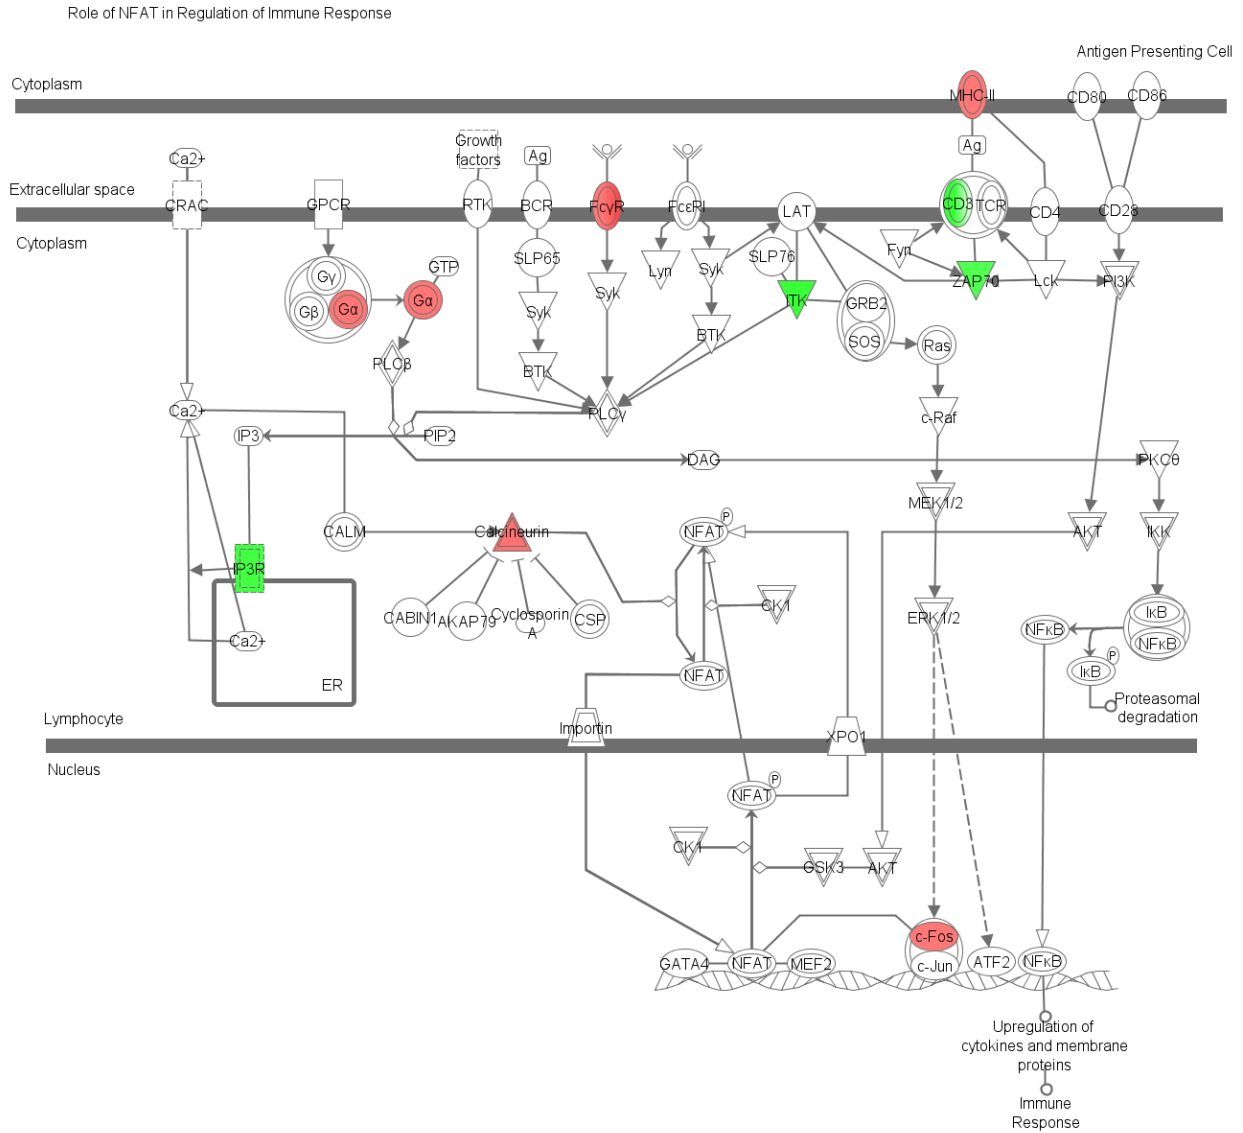



4. There were more genes involved in Toll-like receptor signaling within the dataset compared to the total number of genes in the Toll-like receptor pathway with a ratio >2 and  $p=3.33E00$  (*TLR2*, *TLR1*, *FOS*, *LY96*, *TLR8* (includes *EG:51311*), *IF2AK2*, *IRAK3*).

Toll-like Receptor Signaling

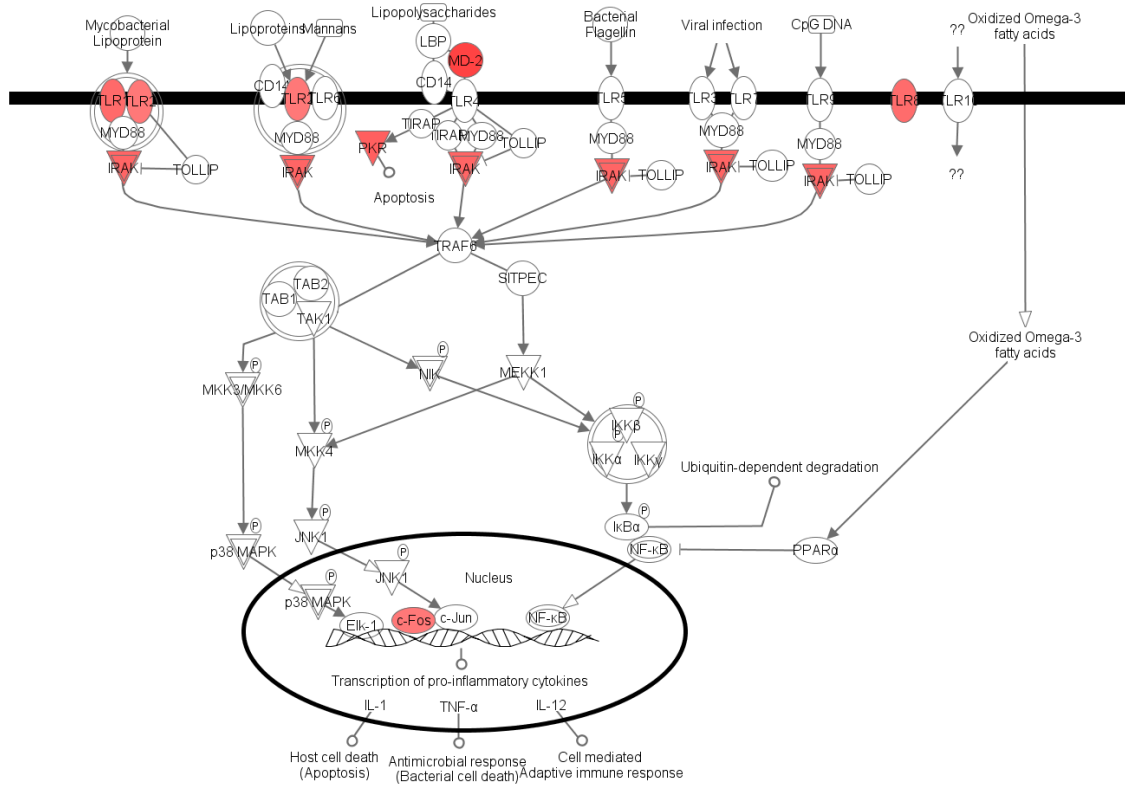

5. There are 7 genes in the dataset involved in calcium-induced T lymphocyte apoptosis ( $p=2.92E00$ ): *CD247*, *CD3E*, *PPP3R1*, *ITPR3*, *ZAP70*, *CD3D*, and *HLA-DRB5*

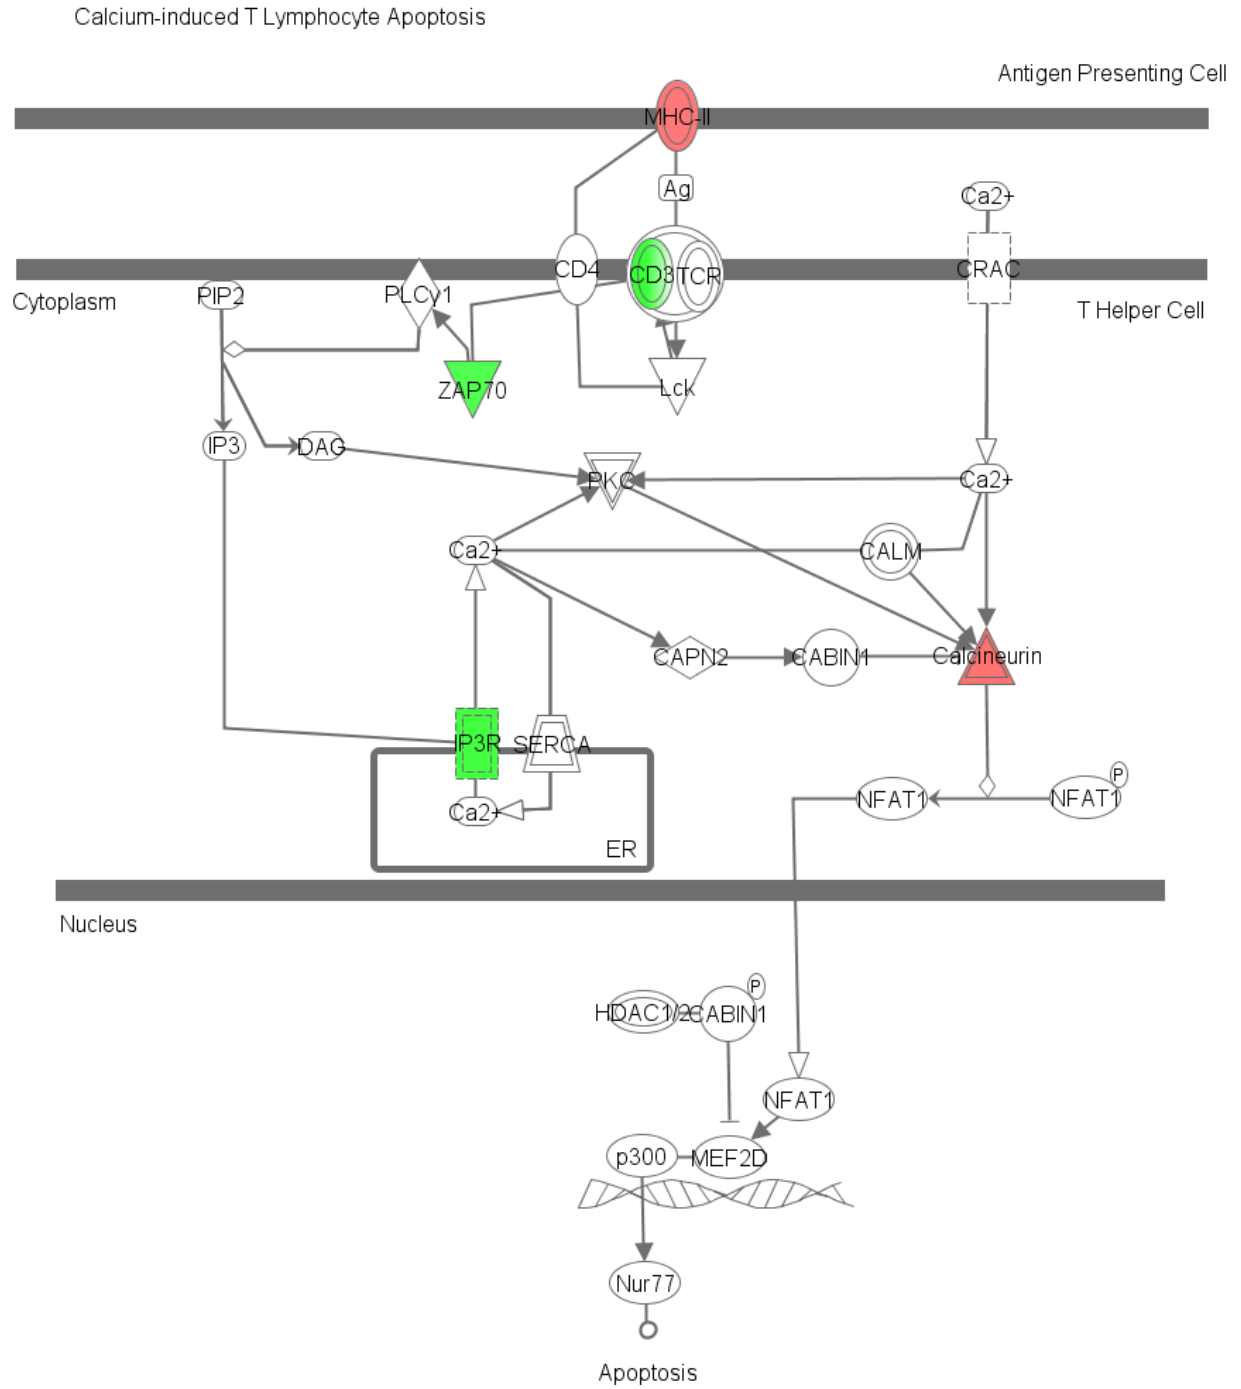

Supplement: supp_75_11_1009__2.pdf [file supp_75_11_1009__2.pdf]
