# Supplementary material
Source: PubMed Central journal article supplement (PMC2942033)
Supplement: supp_75_11_1009__1.pdf [file supp_75_11_1009__1.pdf]

**Table E-1. Gene Lists from Beadstudio and Genespring**

**A. Beadstudio 2 fold, p<0.05 Gene List, 19 Genes**

| Gene    | Diff Score* | Regulation |
|---------|-------------|------------|
| ARG1    | 44.13       | up         |
| BNIP3L  | 25.68       | up         |
| CA4     | 40.43       | up         |
| CCR7    | -71.37      | down       |
| CEACAM6 | 16.8        | up         |
| CEACAM8 | 15.99       | up         |
| CSPG2   | 53.25       | up         |
| ECHDC3  | 17.85       | up         |
| FKBP5   | 15.1        | up         |
| IQGAP1  | 70.95       | up         |
| KCTD12  | 14.99       | up         |
| LY96    | 49.69       | up         |
| MMP9    | 30.01       | up         |
| OLFM4   | 18.97       | up         |
| ORM1    | 17.00       | up         |
| PDK4    | 102.71      | up         |
| S100A12 | 39.53       | up         |
| SDPR    | 41.33       | up         |
| TPST1   | 26.83       | up         |

\*Diff score: Using the Illumina Custom Algorithm a Diff score is calculated from the p-value of significance. {DiffScore = (10sgn(Icond-Iref)log10(p))} For each gene, Diff scores of corresponding probes are averaged and concordance between the probes is reported.

For a p-value of 0.05, Diff score =  $\pm 13$

For a p-value of 0.01, Diff score =  $\pm 20$

For a p-value of 0.001, Diff score =  $\pm 30$

*Legend:* ARG1=Arginase 1; BNIP3L= BCL2/adenovirus E1B 19kDa interacting protein 3-like; CA4= Carbonic anhydrase 4; CCR7=Chemokine receptor 7; CEACAM6= carcinoembryonic antigen-related cell adhesion molecule 6; CEAMCAM8= carcinoembryonic antigen-related cell adhesion molecule 8; CSPG2=Chondroitin sulfate proteoglycan 2; ECHDC3= Enoyl-CoA hydratase domain-containing protein 3; FKBP5= FK506 binding protein 5; IQGAP1= IQ motif containing GTPase activating protein 1; KCTD12= potassium channel tetramerisation domain containing 12; LY96= Lymphocyte antigen 96; MMP9=Matrix metalloproteinase 9; OLFM4= olfactomedin 4; ORM1= orosomucoid 1; PDK4= pyruvate dehydrogenase kinase, isozyme 4; S100A12= S100 calcium binding protein A12; SDPR= serum deprivation response; TPST1= tyrosylprotein sulfotransferase 1

## **B. GeneSpring 2 fold, p<0.05 Gene List, 16 Genes**

| Gene     | p-value*  | Regulation |
|----------|-----------|------------|
| ACSL1    | 4.03e-04  | up         |
| AKAP7    | 0.001     | up         |
| APOBEC3A | 0.03      | up         |
| ARG1     | 2.84 E-07 | up         |
| CA4      | 2.00 E-04 | up         |
| CCR7     | 4.37 E-05 | down       |
| CRISPLD2 | 4.74 E-06 | up         |
| CSPG2    | 3.45 E-05 | up         |
| FCGR3B   | 0.024     | up         |

|         |           |    |
|---------|-----------|----|
| FOLR3   | 9.23 E-04 | up |
| IQGAP1  | 7.97 E-07 | up |
| LY96    | 0.001     | up |
| MMP9    | 1.11 E-05 | up |
| ORM1    | 0.006     | up |
| PADI4   | 4.70 E-06 | up |
| S100A12 | 3.87 E-04 | up |

---

\*Bonferroni Family wise error (FWER) corrected p-value

*Legend:* ACSL1= acyl-CoA synthetase long-chain family member 1; AKAP7=A-kinase anchor protein 7; APOBEC3A= apolipoprotein B mRNA editing enzyme, catalytic polypeptide-like 3A; ARG1=Arginase 1; CA4= Carbonic anhydrase 4; CCR7=Chemokine receptor 7; CRISPLD2= cysteine-rich secretory protein LCCL domain containing 2; CSPG2= Chondroitin sulfate proteoglycan 2; FCGR3B= Fc fragment of IgG, low affinity IIIb, receptor (CD16b); FOLR3= folate receptor 3; IQGAP1= IQ motif containing GTPase activating protein 1; LY96= Lymphocyte antigen 96; MMP9=Matrix metalloproteinase 9; ORM1= orosomucoid 1; PADI4= peptidyl arginine deiminase, type IV; S100A12= S100 calcium binding protein A12

For questions related to the material in this supplemental table contact Taura L. Barr at [barrt@mail.nih.gov](mailto:barrt@mail.nih.gov).
